# Supplementary material
Source: PubMed Central journal article supplement (PMC7282970)
Supplement: NIHMS1541786-supplement-1.pdf [file NIHMS1541786-supplement-1.pdf]

**Supplement: Association of demographic and clinical characteristics with mean VA**

| Characteristic                      |              | N (%)<br>at Baseline | ETDRS Equivalent<br>Lines of Visual<br>Acuity (95% CI) | p-value |
|-------------------------------------|--------------|----------------------|--------------------------------------------------------|---------|
| Uveitis Location                    | Anterior     | 4525 (51%)           | reference                                              | <0.001  |
|                                     | Intermediate | 1658 (19%)           | -0.70 (-0.42, -0.98)                                   |         |
|                                     | Posterior    | 1605 (18%)           | -2.2 (-1.9, -2.5)                                      |         |
|                                     | Panuveitis   | 1011 (11%)           | -2.3 (-2.0, -2.6)                                      |         |
| Race/Ethnicity*                     | White        | 6457 (73%)           | reference                                              | <0.001  |
|                                     | Black        | 1317 (15%)           | -0.19 (+0.10, -0.48)                                   |         |
|                                     | Hispanic     | 380 (4%)             | -1.1 (-0.60, -1.6)                                     |         |
|                                     | Other        | 645 (7%)             | +0.23 (+0.61, -0.14)                                   |         |
| Smoking                             | Never        | 5113 (58%)           | reference                                              | <0.001  |
|                                     | Past         | 929 (11%)            | -0.22 (+0.11, -0.55)                                   |         |
|                                     | Current      | 1486 (17%)           | -0.99 (-0.71, -1.3)                                    |         |
|                                     | Unknown†     | 1271 (14%)           | +0.32 (+0.66, -0.03)                                   |         |
| Gender                              | Male         | 3097 (35%)           | +0.01 (+0.21, -0.20)                                   | 0.93    |
|                                     | Female       | 5702 (65%)           | reference                                              |         |
| Age                                 | <18          | 1104 (13%)           | +0.16 (+0.54, -0.21)                                   | <0.001  |
|                                     | 18-25        | 720 (8%)             | -0.28 (+0.12, -0.68)                                   |         |
|                                     | 26-35        | 1596 (18%)           | +0.03 (+0.34, -0.27)                                   |         |
|                                     | 36-45        | 1878 (21%)           | reference                                              |         |
|                                     | 46-55        | 1673 (19%)           | -0.17 (+0.13, -0.47)                                   |         |
|                                     | 56-65        | 1008 (11%)           | -0.53 (-0.18, -0.89)                                   |         |
|                                     | >65          | 820 (9%)             | -1.9 (-1.5, -2.3)                                      |         |
| Behçet Disease                      | No           | 8575 (97%)           | reference                                              | <0.001  |
|                                     | Yes          | 224 (3%)             | -1.0 (-0.42, -1.7)                                     |         |
| Sarcoidosis                         | No           | 8198 (93%)           | reference                                              | 0.04    |
|                                     | Yes          | 601 (7%)             | +0.40 (+0.78, +0.01)                                   |         |
| Juvenile idiopathic arthritis (JIA) | No           | 8388 (95%)           | reference                                              | 0.13    |
|                                     | Yes          | 411 (5%)             | -0.39 (+0.12, -0.90)                                   |         |
| Spondyloarthropathy                 | No           | 8381 (95%)           | reference                                              | 0.22    |
|                                     | Yes          | 418 (5%)             | -0.30 (+0.17, -0.76)                                   |         |
| Inflammatory Bowel Disease (IBD)**  | No           | 8570 (97%)           | reference                                              | 0.27    |
|                                     | Yes          | 229 (3%)             | +0.34 (+0.95, -0.26)                                   |         |

|                                                                     |                      |                         |                       |        |
|---------------------------------------------------------------------|----------------------|-------------------------|-----------------------|--------|
| Other Systemic Inflammatory Disease                                 | No                   | 8432 (96%)              | reference             | 0.11   |
|                                                                     | Yes                  | 367 (4%)                | -0.39 (+0.09, -0.87)  |        |
| Prior Cataract Surgery                                              | Never                | 7785 (88%)              | reference             | <0.001 |
|                                                                     | Prior to Baseline    | 1014 (12%)              | -3.0 (-2.6, -3.3)     |        |
|                                                                     | During Follow-up     | 0 (0%) <sup>*****</sup> | +2.9 (+3.0, +2.7)     |        |
| Prior Glaucoma Surgery                                              | No                   | 8626 (98%)              | reference             | <0.001 |
|                                                                     | Yes                  | 173 (2%)                | -0.68 (-0.44, -0.91)  |        |
| Prior Retinal Detachment Surgery                                    | No                   | 8721 (99%)              | reference             | <0.001 |
|                                                                     | Yes                  | 78 (1%)                 | -3.6 (-3.1, -4.2)     |        |
| Prior Pars Plana Vitrectomy (not for retinal detachment)            | No                   | 8548 (97%)              | reference             | <0.001 |
|                                                                     | Yes                  | 251 (3%)                | -1.3 (-1.1, -1.5)     |        |
| Duration of Uveitis Prior to Presentation for Tertiary Uveitis Care | ≤6 months            | 3017 (34%)              | reference             | <0.001 |
|                                                                     | >6 months to 2 years | 2009 (23%)              | -0.35 (-0.09, -0.61)  |        |
|                                                                     | >2 to 5 years        | 1592 (18%)              | -0.53 (-0.25, -0.81)  |        |
|                                                                     | ≥5 years             | 2181 (25%)              | -1.2 (-0.90, -1.4)    |        |
| Anterior Chamber Cells                                              | Quiet                | 5145 (58%)              | reference             | <0.001 |
|                                                                     | 0.5+                 | 1470 (17%)              | -0.20 (-0.12, -0.28)  |        |
|                                                                     | 1+                   | 1043 (12%)              | -0.45 (-0.34, -0.55)  |        |
|                                                                     | 2+ or worse          | 1141 (13%)              | -1.0 (-0.89, -1.1)    |        |
| Vitreous Cells                                                      | Quiet                | 4927 (56%)              | reference             | <0.001 |
|                                                                     | 0.5+                 | 1190 (14%)              | +0.18 (+0.26, +0.09)  |        |
|                                                                     | 1+                   | 1412 (16%)              | -0.10 (-0.007, -0.20) |        |
|                                                                     | 2+ or worse          | 1270 (14%)              | -0.59 (-0.47, -0.72)  |        |
| Vitreous Haze <sup>***</sup>                                        | Quiet                | 6881 (78%)              | reference             | <0.001 |
|                                                                     | 1+                   | 956 (11%)               | -0.40 (-0.29, -0.50)  |        |
|                                                                     | 2+                   | 350 (4%)                | -1.5 (-1.3, -1.7)     |        |
|                                                                     | 3+ or worse          | 107 (1%)                | -4.2 (-3.9, -4.6)     |        |
|                                                                     | Missing <sup>†</sup> | 505 (6%)                | -0.89 (-0.61, -1.2)   |        |
| Intraocular Pressure                                                | ≤5 mm Hg             | 98 (1%)                 | -2.5 (-2.3, -2.8)     | <0.001 |
|                                                                     | 6-23 mm Hg           | 7743 (88%)              | reference             |        |
|                                                                     | 24-29 mm Hg          | 339 (4%)                | -0.19 (-0.05, -0.33)  |        |
|                                                                     | ≥30                  | 213 (2%)                | -0.34 (-0.15, -0.53)  |        |
|                                                                     | Missing <sup>†</sup> | 406 (5%)                | -0.89 (-0.59, -1.2)   |        |
| Posterior Synechiae, Any                                            | No                   | 7514 (85%)              | reference             | <0.001 |
|                                                                     | Yes                  | 1285 (15%)              | -0.46 (-0.34, -0.57)  |        |

|                                       |                      |            |                       |        |
|---------------------------------------|----------------------|------------|-----------------------|--------|
| Peripheral Anterior<br>Synechiae, Any | No                   | 8527 (97%) | reference             | <0.01  |
|                                       | Yes                  | 272 (3%)   | -0.42 (-0.17, -0.68)  |        |
| Band Keratopathy, Any                 | No                   | 7087 (81%) | reference             | <0.001 |
|                                       | Yes                  | 240 (3%)   | -0.41 (-0.15, -0.68)  |        |
|                                       | Missing <sup>†</sup> | 1472 (17%) | +0.45 (+0.68, +0.22)  |        |
| Macular Edema                         | No                   | 7490 (85%) | reference             | <0.001 |
|                                       | Yes                  | 1309 (15%) | -0.90 (-0.81, -0.99)  |        |
| Epiretinal Membrane                   | No                   | 8321 (95%) | reference             | 0.89   |
|                                       | Yes                  | 478 (5%)   | -0.008 (+0.10, -0.12) |        |
| Choroidal<br>Neovascularization       | No                   | 8725 (99%) | reference             | <0.001 |
|                                       | Yes                  | 74 (1%)    | -1.8 (-1.3, -2.2)     |        |
| Snowbanking <sup>****</sup>           | No                   | 8407 (96%) | reference             | 0.46   |
|                                       | Yes                  | 392 (4%)   | -0.09 (+0.14, -0.31)  |        |
| Retinal Vascular Sheathing            | No                   | 8089 (92%) | reference             | 0.02   |
|                                       | Yes                  | 710 (8%)   | +0.17 (+0.31, +0.03)  |        |
| Retinal Vascular Occlusion            | No                   | 8737 (99%) | reference             | 0.41   |
|                                       | Yes                  | 62 (1%)    | -0.19 (+0.26, -0.64)  |        |

<sup>†</sup> Patients with any missing data at baseline were generally not included in the analysis, but band keratopathy (17%), smoking status (14%), intraocular pressure (IOP, 5%), and vitreous haze (6%) were missing enough baseline measurements to warrant respective separate missing categories

\* Hispanic includes all patients with Hispanic ethnicity

\*\* IBD includes ulcerative colitis and Crohn's disease

\*\*\* 0.5+ was not used for vitreous haze due to a database error; it was instead coded as either Quiet or 1+

\*\*\*\* Snowbanking may have reflected either active exudation or residual fibrosis

\*\*\*\*\* By definition no patients could have had cataract surgery during follow-up before beginning follow-up; 206 (2.3%) of the eyes had cataract surgery performed during follow-up
